# Supplementary material
Source: MDPI journal article supplement (https://www.mdpi.com/1424-2818/14/12/1059)

Supplementary information.

Table S1. Results of identification and counting of dung beetles in the four sampling sites. P1 to P3 refer to periods of sampling. P1 is January 2018, P2 is January 2019, and P3 is November 2019.

[illegible]

| Study site                                                  | SGO1 |    |    | SGO2 |    |    | SGO4 |    |    | SGO7 |    |    |
|-------------------------------------------------------------|------|----|----|------|----|----|------|----|----|------|----|----|
| Period                                                      | P1   | P2 | P3 |
| <i>Canthidium aurichalceum</i> Preudhomme de Borre, 1886    |      |    |    |      |    |    |      |    |    |      |    | 1  |
| <i>Canthidium</i> sp. 1                                     |      | 2  |    |      |    |    |      |    |    |      |    |    |
| <i>Canthidium</i> sp. 2                                     |      | 1  |    |      |    |    |      |    |    |      |    |    |
| <i>Canthidium</i> sp. 3                                     |      | 1  |    |      |    |    |      |    |    |      |    |    |
| <i>Canthidium</i> sp. 4                                     |      | 1  |    |      |    |    |      |    |    |      |    |    |
| <i>Canthidium</i> sp. 5                                     |      | 1  |    |      |    |    |      |    |    |      |    |    |
| <i>Canthidium</i> sp. 6                                     | 21   | 6  | 1  | 8    | 3  |    | 1    |    |    | 2    | 6  | 1  |
| <i>Canthidium</i> sp. 7                                     |      |    |    | 1    |    |    |      | 2  |    |      | 1  |    |
| <i>Canthidium</i> sp. 8                                     |      |    |    |      |    |    |      | 1  |    |      |    | 1  |
| <i>Canthidium</i> sp. 9                                     |      |    |    |      |    |    |      |    |    | 1    | 1  |    |
| <i>Canthidium</i> sp. 10                                    | 1    |    |    | 2    | 2  |    | 4    |    |    | 1    | 4  |    |
| <i>Canthidium</i> sp. 11                                    |      |    |    | 1    |    |    |      |    |    |      |    |    |
| <i>Canthidium</i> sp. 12                                    |      |    |    | 1    | 2  | 2  |      |    |    |      | 2  |    |
| <i>Canthidium</i> sp. 13                                    |      |    |    |      | 1  |    |      |    |    |      |    |    |
| <i>Canthidium</i> sp. 14                                    |      |    |    |      | 13 |    |      |    |    |      |    |    |
| <i>Canthidium</i> sp. 15                                    | 1    |    |    |      | 4  |    |      |    |    |      |    |    |
| <i>Canthidium</i> sp. 16                                    |      |    |    |      | 1  |    |      |    |    |      | 2  |    |
| <i>Canthidium</i> sp. 17                                    |      |    |    |      | 1  |    |      |    |    |      |    |    |
| <i>Canthidium</i> sp. 18                                    |      |    |    |      | 1  |    |      |    |    |      |    |    |
| <i>Canthidium</i> sp. 19                                    |      |    |    |      |    |    |      |    |    |      | 1  |    |
| <i>Canthidium</i> sp. 20                                    |      |    |    | 1    |    |    |      |    |    |      |    |    |
| <i>Canthidium</i> sp. 21                                    |      |    | 1  |      |    |    |      |    |    |      |    | 1  |
| <i>Canthidium</i> sp. 22                                    |      |    |    |      |    |    |      |    |    | 1    |    |    |
| <i>Deltochilum carinatum</i> (Westwood, 1837)               | 1    |    |    | 1    | 3  | 4  |      |    | 2  | 1    |    | 2  |
| <i>Deltochilum guyannense</i> Paulian, 1933                 |      |    | 1  | 2    | 1  | 1  |      |    |    |      | 1  |    |
| <i>Deltochilum icarus</i> (Olivier, 1789)                   | 1    |    | 3  | 2    |    | 3  | 2    | 1  | 14 | 1    | 2  | 7  |
| <i>Deltochilum orbiculare</i> Lansberge, 1874               | 1    |    |    | 3    | 3  | 5  | 2    |    | 3  | 3    | 1  | 6  |
| <i>Deltochilum septemstriatum</i> Paulian, 1938             | 2    | 4  | 20 | 8    | 5  | 13 | 2    | 4  | 13 | 1    | 6  | 5  |
| <i>Deltochilum submetallicum</i> (Castelnau, 1840)          | 2    | 1  | 7  | 8    | 12 | 1  |      |    |    | 2    | 17 | 1  |
| <i>Eurysternus balachowskyi</i> (Halffter & Martinez, 1977) |      |    |    | 1    |    |    |      |    | 3  |      |    |    |

| Study site<br>Period                                   | SGO1 |    |    | SGO2 |    |    | SGO4 |    |    | SGO7 |    |    |
|--------------------------------------------------------|------|----|----|------|----|----|------|----|----|------|----|----|
|                                                        | P1   | P2 | P3 |
| <i>Eurysternus cambeforti</i> Génier, 2009             |      |    | 2  |      |    | 2  |      |    |    |      |    |    |
| <i>Eurysternus caribaeus</i> (Herbst, 1789)            | 11   | 2  | 2  | 16   | 12 | 12 | 22   | 13 | 12 | 34   | 16 | 3  |
| <i>Eurysternus cayennensis</i> Castelnau, 1840         |      |    | 5  | 1    |    | 1  |      |    | 3  | 3    | 1  | 2  |
| <i>Eurysternus cyclops</i> Génier, 2009                | 1    | 1  | 1  | 6    |    | 2  | 17   | 5  | 9  | 5    | 9  | 7  |
| <i>Eurysternus foedus</i> Guérin-Méneville, 1830       | 7    | 1  | 2  | 8    | 2  | 2  | 7    | 7  | 2  | 424  | 9  | 4  |
| <i>Eurysternus hamaticollis</i> Balthasar, 1939        |      |    |    |      |    |    |      |    |    | 2    |    |    |
| <i>Eurysternus hypocrita</i> Balthasar, 1939           | 1    |    | 3  | 7    | 3  |    | 4    | 5  | 16 | 8    | 7  | 2  |
| <i>Eurysternus ventricosus</i> Gill, 1990              | 1    |    |    | 6    | 1  |    | 4    |    | 2  |      | 4  |    |
| <i>Eurysternus vastiorum</i> Martinez, 1988            |      |    |    |      |    |    |      |    | 1  |      |    |    |
| <i>Phanaeus cambeforti</i> Arnaud, 1982                |      | 1  |    | 6    |    | 2  |      |    |    | 1    | 1  |    |
| <i>Megaphanaeus lancifer</i> (Linnaeus, 1767)          | 4    |    | 6  | 27   | 6  | 11 | 7    |    | 8  | 4    | 1  | 2  |
| <i>Coprophanaeus christophorowi</i> (Olsoufieff, 1924) |      |    |    |      |    |    | 1    |    |    |      |    |    |
| <i>Coprophanaeus jasius</i> (Olivier, 1789)            | 1    | 1  |    | 2    |    | 1  | 3    |    | 1  |      | 1  | 1  |
| <i>Coprophanaeus parvulus</i> (Olsoufieff, 1924)       |      |    |    |      |    | 1  |      |    |    |      |    |    |
| <i>Oxysternon durantoni</i> Arnaud, 1984               | 1    |    |    | 6    | 1  | 2  | 6    |    | 1  | 3    |    | 1  |
| <i>Oxysternon festivum</i> (Linnaeus, 1767)            | 8    | 1  | 11 | 9    | 1  | 14 | 19   | 2  | 22 | 14   | 14 | 17 |
| <i>Ontherus sulcator</i> (Fabricius, 1775)             |      | 1  | 2  |      |    |    |      |    |    |      |    |    |
| <i>Dichotomius apicalis</i> (Luderwalt, 1931)          | 9    | 2  | 3  | 5    |    | 3  | 2    |    | 6  | 13   | 3  | 13 |
| <i>Dichotomius boreus</i> (Olivier, 1789)              | 5    | 13 | 14 | 6    | 7  | 4  | 7    | 8  | 5  | 12   |    | 1  |
| <i>Dichotomius lucasi</i> (Harold, 1869)               |      |    | 1  | 2    |    |    |      |    |    | 12   | 6  | 1  |
| <i>Dichotomius subaeneus</i> (Castelnau, 1840)         | 4    |    | 1  | 3    | 3  |    | 4    |    | 2  | 11   |    |    |
| <i>Dichotomius cf ascarinus</i>                        |      |    | 1  |      |    |    |      |    |    |      |    |    |
| <i>Dichotomius</i> sp.nov.139                          |      |    |    |      |    | 1  |      |    |    |      |    |    |
| <i>Dichotomius</i> sp. 2                               |      |    |    |      |    |    |      |    |    | 1    |    |    |
| <i>Onthophagus haematopus</i> Harold, 1875             | 36   | 5  | 27 | 95   | 19 | 57 | 36   | 17 | 32 | 56   | 35 | 11 |
| <i>Onthophagus</i> sp. 2                               | 2    | 1  | 1  |      |    | 5  | 1    |    | 1  | 3    | 1  |    |

Figure S1. Figure showing the first two axes of the NMDS analysis, considering dung beetles assemblage in the four sites near St\_Georges and the sites from Feer & Boissier [8], i.e. Kaw, Matoury, and Nouragues.

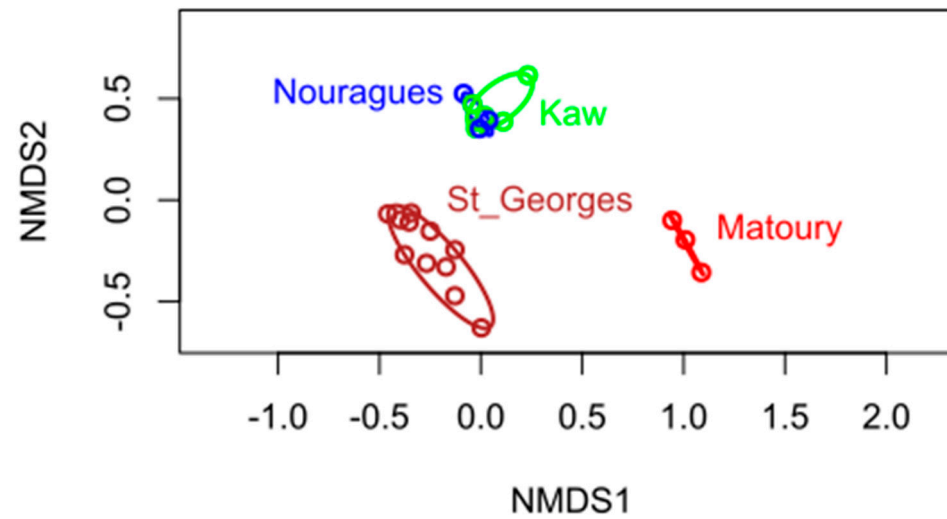

Supplement: s1 [file s1]
